# Supplementary material for: A Prototypical Small-Molecule Modulator Uncouples Mitochondria in Response to Endogenous Hydrogen Peroxide Production
Source: PubMed Central journal article supplement (PMC3743171; doi:10.1002/cbic.201300115), 2013-05-02
Supplement: cbic0014-0993-SD1.pdf [file cbic0014-0993-SD1.pdf]

**CHEMBIOCHEM**

## Supporting Information

© Copyright Wiley-VCH Verlag GmbH & Co. KGaA, 69451 Weinheim, 2013

### **A Prototypical Small-Molecule Modulator Uncouples Mitochondria in Response to Endogenous Hydrogen Peroxide Production**

Stephen J. McQuaker,<sup>[a]</sup> Casey L. Quinlan,<sup>[b]</sup> Stuart T. Caldwell,<sup>[a]</sup> Martin D. Brand,<sup>[b]</sup> and Richard C. Hartley\*<sup>[a]</sup>

cbic\_201300115\_sm\_miscellaneous\_information.pdf

## Supplementary material:

### A prototypical small molecule modulator uncouples mitochondria in response to endogenous hydrogen peroxide production.

Stephen J. McQuaker,<sup>[a]</sup> Casey L. Quinlan,<sup>[b]</sup> Stuart T. Caldwell,<sup>[a]</sup> Martin D. Brand,<sup>[b]</sup> and Richard C. Hartley.<sup>[a]\*</sup>

<sup>[a]</sup>Centre for the Chemical Research of Ageing, WestCHEM School of Chemistry, University of Glasgow, Glasgow, G12 8QQ, UK

<sup>[b]</sup>Buck Institute for Research on Aging, 8001 Redwood Boulevard, Novato, California 94945, USA.

### Synthesis of aldehyde **5** and phosphonium salt **8**.

Supplementary Scheme 1 (a) The synthesis of aldehyde **5** from carboxylic acid **9**: the acid **9** was converted into ester **10** and the phenol protected as MOM ether **11**; reduction to the alcohol **12**, followed by Swern oxidation then gave aldehyde **5**. (b) The synthesis of phosphonium salt **8** from  $\alpha, \alpha'$ -*para*-dibromoxylene **13**.

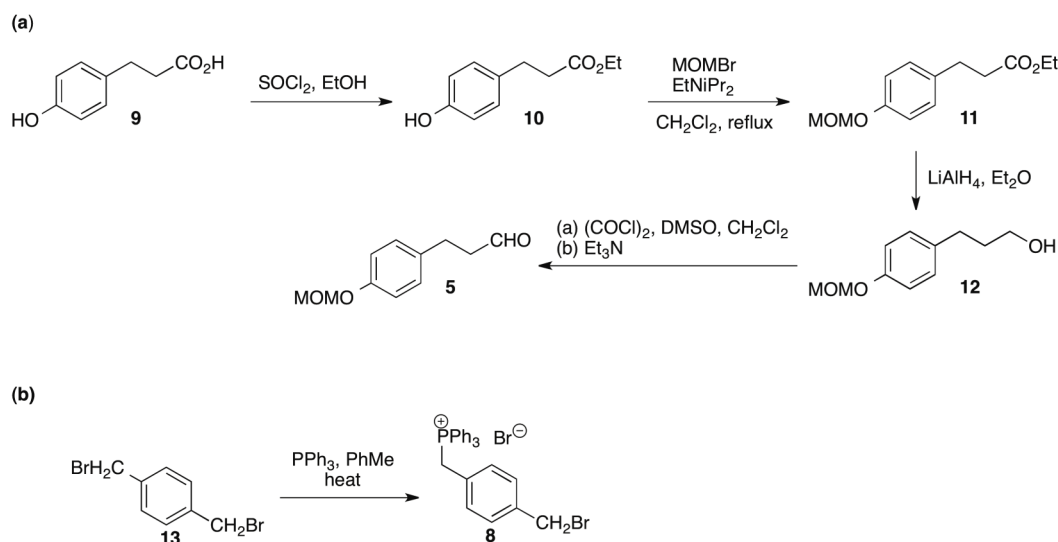

### **Ethyl 3-(4'-hydroxyphenyl)propionate **10****

Thionyl chloride (10.54 mL, 144.4 mmol) was added dropwise to a stirring solution of 3-(4'-hydroxyphenyl)propionic acid **9** (8.00 g, 48.1 mmol) in EtOH (150 mL). The solution was stirred at reflux for 4.5 h. After cooling to RT, the solution was concentrated under reduced pressure to give a crude orange oil. Column chromatography [SiO<sub>2</sub>, petroleum ether-EtOAc (9:1) to (3:2)] yielded ethyl ester **10** as an oil that solidified on standing (9.30 g, 99%). *R<sub>f</sub>* [SiO<sub>2</sub>, petroleum ether-EtOAc (7:3)]: 0.47. Mp: 42-43 °C.  $\nu_{\max}$  (ATR): 3364 (OH), 2998 (CH), 2981 (CH), 2962 (CH), 2942 (CH), 2904 (CH), 2870 (CH), 1701 (C=O), 1611 (Ar), 1596 (Ar) cm<sup>-1</sup>.  $\delta_{\text{H}}$  (400 MHz, CDCl<sub>3</sub>): 7.04 (2H, d, *J* = 8.6 Hz, H-2' and H-6'), 6.74 (2H, d, *J* = 8.6 Hz, H-3' and H-5'), 6.02 (1H, broad s, OH), 4.13 (2H, q, *J* = 7.1 Hz, CH<sub>2</sub>CH<sub>3</sub>), 2.87 (2H, t, *J* = 7.9 Hz, 2 × H-3), 2.59 (2H, t, *J* = 7.8 Hz, 2 × H-2), 1.23 (3H, t, *J* = 7.2 Hz, CH<sub>3</sub>).  $\delta_{\text{C}}$  (100 MHz, CDCl<sub>3</sub>): 173.75 (C), 154.24 (C), 132.23 (C), 129.38 (CH), 115.33 (CH), 60.72 (CH<sub>2</sub>), 36.32 (CH<sub>2</sub>), 30.10 (CH<sub>2</sub>), 14.15 (CH<sub>3</sub>). LRMS (EI<sup>+</sup>): 194 (M<sup>+</sup>, 33%), 149 (M<sup>+</sup> - EtO<sup>+</sup>, 9), 120 (M<sup>+</sup> - EtOH and - CO<sub>2</sub>, 78), 107 (HOC<sub>6</sub>H<sub>4</sub>CH<sub>2</sub><sup>+</sup>, 100), 83 (68). HRMS: 194.0945. C<sub>11</sub>H<sub>14</sub>O<sub>3</sub> requires M<sup>+</sup>, 194.0943. <sup>1</sup>H NMR data agree with literature.<sup>S1</sup>

### **Ethyl 3-(4'-methoxymethoxyphenyl)propionate 11**

A stirring solution of ethyl ester **10** (27.00 g, 139 mmol) and *N,N*-diisopropylethylamine (31.5 mL, 181 mmol) in anhydrous DCM (400 mL) was degassed with argon for 30 min. Bromomethyl methyl ether (16.5 mL, 90%, 181 mmol) was added dropwise and the resulting solution stirred at reflux overnight under argon. After cooling to RT, the mixture was washed with aqueous HCl (1 M, 150 mL), H<sub>2</sub>O (2 × 150 mL), dried over MgSO<sub>4</sub> and concentrated under reduced pressure. Column chromatography [SiO<sub>2</sub>, petroleum ether-EtOAc (19:1) to (65:35)] yielded ethyl ester **11** as an oil (31.12 g, 94%). *R<sub>f</sub>* [SiO<sub>2</sub>, petroleum ether-EtOAc (4:1)]: 0.49.  $\nu_{\max}$  (ATR): 2982 (CH), 2955 (CH), 2936 (CH), 2826 (CH), 1732 (C=O), 1613 (Ar), 1586 (Ar) cm<sup>-1</sup>.  $\delta_{\text{H}}$  (400 MHz, CDCl<sub>3</sub>): 7.11 (2H, d, *J* = 8.7 Hz, H-2' and H-6'), 6.94 (2H, d, *J* = 8.7 Hz, H-3' and H-5'), 5.13 (2H, s, OCH<sub>2</sub>O), 4.11 (2H, q, *J* = 7.1 Hz, CH<sub>2</sub>CH<sub>3</sub>), 3.45 (3H, s, OMe), 2.88 (2H, t, *J* = 7.8 Hz, 2 × H-3), 2.57 (2H, t, *J* = 7.9 Hz, 2 × H-2), 1.22 (3H, t, *J* = 7.2 Hz, CH<sub>2</sub>CH<sub>3</sub>).  $\delta_{\text{C}}$  (100 MHz, CDCl<sub>3</sub>): 172.87 (C), 155.72 (C), 133.98 (C), 129.29 (CH), 116.30 (CH), 94.49 (CH<sub>2</sub>), 60.33 (CH<sub>2</sub>), 55.85 (CH<sub>3</sub>), 36.15 (CH<sub>2</sub>), 30.17 (CH<sub>2</sub>), 14.21 (CH<sub>3</sub>). LRMS (EI<sup>+</sup>): 238 (M<sup>+</sup>, 51%), 45 (CH<sub>3</sub>OCH<sub>2</sub><sup>+</sup>, 100). HRMS: 238.1209. C<sub>13</sub>H<sub>18</sub>O<sub>4</sub> requires M<sup>+</sup>, 238.1205. Compound reported in literature without characterisation data.<sup>S2</sup>

### **3-(4'-Methoxymethoxyphenyl)propan-1-ol 12**

A stirring solution of ethyl ester **11** (8.73 g, 36.6 mmol) in anhydrous Et<sub>2</sub>O (140 mL) was cooled to 0 °C under argon and LiAlH<sub>4</sub> (4.17 g, 109.8 mmol) was added portionwise. The solution was stirred at 0 °C under argon for 45 min before being allowed to warm to RT overnight. H<sub>2</sub>O (25 mL) was added dropwise to quench. H<sub>2</sub>O (20 mL) and Et<sub>2</sub>O (100 mL) were added to dilute and the mixture stirred until the precipitate settled. The organic layer was filtered through a pad of celite and washed through with Et<sub>2</sub>O. Organics were dried over MgSO<sub>4</sub> and concentrated under reduced pressure to yield alcohol **12** as an oil (6.05 g, 84%).  $\nu_{\max}$  (ATR): 3347 (OH), 2994 (CH), 2937 (CH), 2902 (CH), 2861 (CH), 2827 (CH), 2785 (CH), 1612 (Ar), 1585 (Ar) cm<sup>-1</sup>.  $\delta_{\text{H}}$  (400 MHz, CDCl<sub>3</sub>): 7.08 (2H, d, *J* = 8.7 Hz, H-2' and H-6'), 6.94 (2H, d, *J* = 8.7 Hz, H-3' and H-5'), 5.11 (2H, s, OCH<sub>2</sub>O), 3.59 (2H, broad t, *J* = 5.9 Hz, 2 × H-1), 3.44 (3H, s, OMe), 3.00 (1H, broad s, OH), 2.61 (2H, t, *J* = 7.7 Hz, 2 × H-3), 1.86-1.77 (2H, m, 2 × H-2).  $\delta_{\text{C}}$  (100 MHz, CDCl<sub>3</sub>): 155.31 (C), 135.36 (C), 129.33 (CH), 116.23 (CH), 94.50 (CH<sub>2</sub>), 61.81 (CH<sub>2</sub>), 55.84 (CH<sub>3</sub>), 34.34 (CH<sub>2</sub>), 31.17 (CH<sub>2</sub>). LRMS (CI<sup>+</sup>): 197 [(M + H)<sup>+</sup>, 46%], 165 [(M + H)<sup>+</sup> - MeOH, 100]. HRMS: 197.1179. C<sub>11</sub>H<sub>17</sub>O<sub>3</sub> requires (M + H)<sup>+</sup>, 197.1178. <sup>1</sup>H and <sup>13</sup>C NMR are in agreement with literature, excluding the misreported <sup>13</sup>C NMR peak at 192.25 ppm (corresponds to peak the CH at 129.33 ppm above).<sup>24</sup>

### **3-(4'-Methoxymethoxyphenyl)propionaldehyde 5**

Oxalyl chloride (1.9 mL, 21.6 mmol) was added to anhydrous DCM (70 mL) at -78 °C under argon and stirred for 5 min. Anhydrous DMSO (2.7 mL, 38.0 mmol) was added and the resulting solution stirred at -78 °C for 30 min. A solution of alcohol **12** (3.00 g, 15.3 mmol) in anhydrous DCM (20 mL) was added slowly. After stirring for 30 min, anhydrous triethylamine (10.65 mL, 76.4 mmol) was added. After stirring for a further 30 min at -78 °C, the solution was allowed to warm to RT and stir for a further 2.5 h. The reaction was concentrated under reduced pressure. H<sub>2</sub>O (50 mL) was added and extractions were made with DCM (3 × 30 mL). Combined organics were dried over MgSO<sub>4</sub> and concentrated under reduced pressure. Column chromatography [SiO<sub>2</sub>, petroleum ether-EtOAc (9:1) to (7:3)] yielded aldehyde **5** as an oil (2.97 g, 94%). *R<sub>f</sub>* [SiO<sub>2</sub>, petroleum ether-EtOAc (4:1)]: 0.44.  $\nu_{\max}$  (ATR): 2996 (CH), 2957 (CH), 2933 (CH), 2898 (CH), 2848 (CH), 2826 (CH), 2792 (CH), 1722 (C=O), 1611 (Ar), 1585 (Ar) cm<sup>-1</sup>.  $\delta_{\text{H}}$  (400 MHz, CDCl<sub>3</sub>): 9.78 (1H, t, *J* = 1.4 Hz, H-1), 7.10 (2H, d, *J* = 8.7 Hz, H-2' and H-6'), 6.96 (2H, d, *J* = 8.6 Hz, H-3' and H-5'), 5.13 (2H, s, OCH<sub>2</sub>O), 3.45 (3H, s, OMe), 2.89 (2H, t, 2 × H-3, *J* = 7.5 Hz), 2.73 (2H, broad t, 2 × H-2, *J* = 7.5 Hz).  $\delta_{\text{C}}$  (100 MHz, CDCl<sub>3</sub>): 201.60 (CH), 155.73 (C), 133.72 (C), 129.26 (CH), 116.42 (CH), 94.48 (CH<sub>2</sub>), 55.84 (CH<sub>3</sub>), 45.39 (CH<sub>2</sub>), 27.27 (CH<sub>2</sub>). <sup>1</sup>H and <sup>13</sup>C NMR data agree with literature.<sup>24</sup>

### **[4-(Bromomethyl)benzyl]triphenylphosphonium bromide 8**

A solution of triphenylphosphine (100 mg, 0.38 mmol) in anhydrous toluene (1.25 mL) was added dropwise to a stirring solution of  $\alpha, \alpha'$ -*para*-dibromoxylene **13** (604 mg, 2.3 mmol) in anhydrous toluene (2.5 mL) at 95 °C under argon and stirred for 1 h. A further solution of triphenylphosphine (100 mg, 0.38 mmol) in anhydrous toluene (2.5 mL) was added dropwise and the resulting mixture was stirred for 5 h at 95 °C under argon. The hot mixture was filtered and the precipitate washed with hot toluene and then Et<sub>2</sub>O. The solid was dried under reduced pressure to yield phosphonium bromide **8** as an amorphous solid (391 mg, 98%). Mp: >220 °C (Decomp.).  $\nu_{\max}$  (ATR): 3054 (CH), 3010 (CH), 2990 (CH), 2965 (CH), 2887 (CH), 2850 (CH), 2779 (CH), 1604 (Ar), 1588 (Ar), 1572 (Ar).  $\delta_{\text{H}}$  (400 MHz, CD<sub>3</sub>CN): 7.91-7.84 (3H, m, 3 × *p*-H PPh<sub>3</sub>), 7.72-7.64 (6H, m, 6 × *o*-H PPh<sub>3</sub>), 7.61-7.51 (6H, m, 6 × *m*-H PPh<sub>3</sub>), 7.27 (2H, d,  $J = 7.7$  Hz, H-3 and H-5), 6.94 (2H, dd,  $J = 7.9$  and 1.8 Hz, H-2 and H-6), 4.68 (2H, d,  $J = 14.3$  Hz, CH<sub>2</sub>P), 4.52 (2H, s, CH<sub>2</sub>Br).  $\delta_{\text{C}}$  (100 MHz, CD<sub>3</sub>CN): 138.89 (d,  $J = 4.6$  Hz, C), 134.95 (d,  $J = 2.9$  Hz, CH), 133.89 (d,  $J = 9.8$  Hz, CH), 131.01 (d,  $J = 5.4$  Hz, CH), 129.77 (d,  $J = 12.6$  Hz, CH), 129.29 (d,  $J = 3.0$  Hz, CH), 127.21 (d,  $J = 7.8$  Hz, C), 117.06 (d,  $J = 86.0$  Hz, C), 32.36 (s, CH<sub>2</sub>), 29.16 (d,  $J = 48.3$  Hz, CH<sub>2</sub>).  $d_{\text{p}} \{^1\text{H}\}$  (162 MHz, CD<sub>3</sub>CN): 22.71 (s). LRMS (ESI<sup>+</sup>): 447 [cation (<sup>81</sup>Br), 100%], 445 [cation (<sup>79</sup>Br), 93]. HRMS: 447.0683 and 445.0707. C<sub>26</sub>H<sub>26</sub><sup>81</sup>BrP requires cation, 447.0695 and C<sub>26</sub>H<sub>26</sub><sup>79</sup>BrP requires cation, 445.0715. LRMS (ESI<sup>-</sup>): 81 (<sup>81</sup>Br<sup>-</sup>, 99%) and 79 (<sup>79</sup>Br<sup>-</sup>, 100).

## References

- S1. P. Sauerberg, G. S. Olsen, L. Jeppesen, J. P. Mogensen, I. Pettersson, C. B. Jeppesen, J. R. Daugaard, E. D. Galsgaard, L. Ynddal, J. Fleckner, V. Panajotova, Z. Polivka, P. Pihera, M. Havranek, E. M. Wulff, *J. Med. Chem.* **2007**, *50*, 1495-1503.
- S2. P. Molina, P. M. Fresneda, M. A. Sanz, *J. Org. Chem.* **1999**, *64*, 2540-2544.
